# Supplementary material
Source: publisher figshare collection journal article supplement (https://gsapubs.figshare.com/articles/dataset/_/12541739)

Grossman, E.L., et al., 2019, Freshwater input, upwelling, and the evolution of Caribbean coastal ecosystems during formation of the Isthmus of Panama: Geology, <https://doi.org/10.1130/G46357.1>

## SUPPLEMENTAL MATERIALS

Freshwater input, upwelling, and the evolution of Caribbean coastal ecosystems during formation of the Isthmus of Panama

**Ethan L. Grossman<sup>1</sup>, John A. Robbins<sup>1\*</sup>, Paola G. Rachello-Dolmen<sup>1,2</sup>, Kai Tao<sup>1</sup>, Divya Saxena<sup>1</sup>, and Aaron O'Dea<sup>2</sup>**

<sup>1</sup> *Department of Geology and Geophysics, Texas A&M University, College Station, TX, USA 77843*

<sup>2</sup> *Naos Island Marine Laboratory, Smithsonian Tropical Research Institute, PO Box 0843-03092 Balboa, Panama*

\* Corresponding author: [e-grossman@tamu.edu](mailto:e-grossman@tamu.edu)

## METHODS

### Sampling Methods

A 0.5 dental drill was used to collect sample powders in holes or along shallow grooves on growth lines in ontogenetic sequence on the spire of the gastropod shells (Figure S1). Sample grooves were used for larger samples (~200 µg) necessary for trace element analyses (data not reported). Representative oxygen and carbon isotopic profiles of modern and fossil gastropod shells are shown in Figure S2.

### Baseline Calculations

To reference nearshore and shelf environments to open ocean conditions, we normalized the

$\delta^{18}\text{O}$  profiles of fossil specimens for each fossil locality to the  $\delta^{18}\text{O}$  values of coeval planktonic foraminifera from deep sea cores. Following the approach of Tao et al. (2013) for modern shells, gastropod  $\delta^{18}\text{O}$  profiles were referenced to open ocean baselines using  $\delta^{18}\text{O}$  measurements of coeval, depth-equivalent planktonic foraminifera from deep-sea cores collected from the same region. The method assumes that planktonic foraminiferal  $\delta^{18}\text{O}$  represents open ocean conditions free of seasonal upwelling and freshening. Though planktonic foraminifera can show seasonal growth patterns, foraminifera from lower latitudes ( $\pm 20^\circ$ ), and *G. ruber* (white) and *G. sacculifer* in particular, are most suitable for estimating mean annual SST (Fraile et al., 2009). Foraminiferal  $\delta^{18}\text{O}$  values were equated to gastropod shell aragonite by correcting for aragonite-calcite fractionation ( $\epsilon_{\text{cc-ar}} = 0.8\text{‰}$ ; Grossman and Ku, 1986).

To test this method, we compared baseline  $\delta^{18}\text{O}$  values for modern *Conus* localities, determined using logger and WOA data (Tao et al., 2013), with values determined from the  $\delta^{18}\text{O}$  of foraminifera from sediment core-tops. The baselines generated using the two techniques fall along the 1:1 line (Table S2, Figure S3).

Foraminiferal  $\delta^{18}\text{O}$  values for the Plio-Pleistocene were obtained from sediment cores ODP 999A (Haug et al., 2001; Steph et al., 2010), DSDP 502B (Prell, 1982), and MD03-2628 (Sepulcre et al., 2011) in the Caribbean and ODP 1241 (Steph et al., 2006), ODP 111-677A,B (Shackleton and Hall, 1989), and ODP 851 (Cannariato and Ravelo, 1997; Ravelo and Shackleton, 1995) in the Pacific (Figure 1). For specimens from depths of 30 m or less, *G. ruber* (white) isotope values were used as the baseline. Specimens with median depths of 50-60 m were normalized using data from *G. sacculifer* foraminifera. For specimens from waters between 100 and 150 m deep, *N. dutertrei* was used. Specimens from 50-100 m deep were normalized using an average of *G. sacculifer* and *N. dutertrei* values. Baselines for shallow water (<30 m)

specimens from La Bomba, Río Limoncito, and Wild Cane Key were determined by adding the average difference between *G. ruber* (white) and *G. sacculifer* foraminifera measurements from 0.5 to 1.0 Ma (-0.16‰; data from Prell, 1982; Sepulcre et al., 2011) to the average of all *G. sacculifer* measurements from ODP 999 over the interval of time represented by the locality. The interval from 0.5 to 1.0 Ma was used because it predates the most severe fluctuations in marine  $\delta^{18}\text{O}$  associated with glaciation (Lisiecki and Raymo, 2005) and goes back as far as the *G. ruber* isotope record exists in this region. No *G. sacculifer* measurements are available for the interval in which Wild Cane Key was deposited, so an average of *G. sacculifer* measurements from 500 kyr before and after was used. Specimens from Isla Popa and La Peña used the average  $\delta^{18}\text{O}$  of *G. sacculifer* specimens from their respective cores and intervals of time (Haug et al., 2001; Steph et al., 2006). All values were converted from calcite to aragonite by adding 0.8‰ (Grossman and Ku, 1986).

We averaged the means of *G. sacculifer* and *N. dutertrei* data from the appropriate intervals to calculate baselines for localities that fall between 50-100 m paleodepth. These localities include Lower Lomas del Mar, Fish Hole, Isla Solarte, Punta Norte East, and Punta Tiburon to Punta Piedra. For younger localities (Upper Lomas del Mar and Pueblo Nuevo Cemetery), *N. dutertrei* data were not available for the entire interval of interest. For Upper Lomas del Mar (1.5-1.7 Ma), the averages of *G. sacculifer* and *N. dutertrei* data from 2.5 to 3.0 Ma (Haug et al., 2001; Steph et al., 2010) were averaged to determine the offset between that average (-0.65‰) and the *G. sacculifer* average (-0.91‰), which was -0.26‰. This value was then subtracted from the average of *G. sacculifer*  $\delta^{18}\text{O}$  measurements from 1.5-1.7 Ma (Prell, 1982) to determine the baseline for Upper Lomas del Mar. The same offset was used to calculate the baseline for Pueblo Nuevo Cemetery, but was subtracted from the average of *G. sacculifer*  $\delta^{18}\text{O}$  measurements from

1.3-1.8 Ma (Prell, 1982) and 2.2-2.7 Ma (Haug et al., 2001). We used the average of *N. dutertrei*  $\delta^{18}\text{O}$  measurements (Steph et al., 2010) over the interval of interest (3.5 to 5.0 Ma) to calculate baselines for deep water localities (100-150 m; SE and NE Escudo de Veraguas).

Baseline  $\delta^{18}\text{O}$  values were compared with measured  $\delta^{18}\text{O}$  values (Figure S4) to produce the  $\delta^{18}\text{O}_{\text{median}} - \delta^{18}\text{O}_{\text{baseline}}$  ( $\Delta^{18}\text{O}_{\text{med-bl}}$ ) box-and-whisker plots (Fig. 3). Median values were used rather than averages to minimize the influence of extreme values. Error bars for each of the baseline calculations ( $\epsilon[\delta^{18}\text{OBL}]$ ) were determined by squaring and then summing the standard deviations ( $1\sigma$ ) of each set of foraminiferal data ( $\epsilon[\delta^{18}\text{OForam1-X}]$ ) used in the calculation. The square of our own isotope analysis precision ( $\epsilon[\delta^{18}\text{OAR}]$ ) was added to this sum before taking the square root of the final sum. This square root represented the error in our baseline calculations.

$$\epsilon(\delta^{18}\text{OBL}) = [\epsilon(\delta^{18}\text{OAR})^2 + \epsilon(\delta^{18}\text{OForam1})^2 + \epsilon(\delta^{18}\text{OForam2})^2 + \dots + \epsilon(\delta^{18}\text{OForamX})^2]^{1/2}$$

## RESULTS

All isotopic results are shown in Table S3.

### Carbon Isotopes and $\delta^{18}\text{O}$ - $\delta^{13}\text{C}$ Correlations

Carbon isotope profiles in these Plio-Pleistocene specimens have proved difficult to interpret and merit additional study. Median values ranged from -1.3 to 2.7‰ except for three *Conus* specimens from Punta Nispero (H19694, H19707, H19715), which yielded median values of -5.8, -6.0, and -16.0‰ (Fig. S5). These  $^{13}\text{C}$ -depleted specimens remain enigmatic, and may reflect oxidation of buried plant matter, including logs, found at Punta Nispero (Collins and Coates, 1999). Unfortunately, we do not have detailed sedimentological data collected with these shells. Excluding the shells, the second most important factor controlling  $\delta^{13}\text{C}$  is taxonomy, with *Strombus* shells mostly <0‰ and *Conus* mostly >0‰. Carbon isotope composition does not

correlate with age or paleodepth.

Previous studies have used  $\delta^{18}\text{O}$ - $\delta^{13}\text{C}$  correlations ( $R_{\text{O-C}}$ ) and  $\delta^{18}\text{O}$  range as proxies for freshening and upwelling, with mixed results (e.g., Killingley and Berger, 1979; Jones and Allmon, 1995; Tao et al., 2013; Anderson et al., 2017). We see no significant correlation between  $R_{\text{O-C}}$  and  $\delta^{18}\text{O}$  range, or between  $R_{\text{O-C}}$  and  $\Delta^{18}\text{O}_{\text{med-bl}}$  for the entire data set and for individual sample localities, age groups, or paleo-depths (Figures S6, S7). In localities influenced by seasonal freshening and upwelling, the freshwater signal can swamp the upwelling signal, resulting in a positive O-C correlation (Tao et al., 2013). However, in special cases like beach-collected shells from the modern Pacific, the isotopic record can be parsed by  $\delta^{18}\text{O}$  into two segments, with positive correlation in the low  $\delta^{18}\text{O}$  segment (rainy season) and negative correlation in the high  $\delta^{18}\text{O}$  segment (dry, upwelling season; Graniero et al., 2017). Such trends, however, can be lost in shells from greater water depth where  $\delta^{18}\text{O}$  range is reduced and other influences like vital effects (physiological processes) and flux of microbial  $\text{CO}_2$  from organic-rich sediments complicate the carbon isotope record.

## PALEOLATITUDE

To ensure that changes in rainfall patterns can be safely ascribed to shifts in the ITCZ rather than plate movements, we determined paleolatitudes for the study area. Paleolatitude has changed little ( $<0.2^\circ$  latitude) in the last 6 Ma (GPlates, 2017, <https://www.gplates.org/>; PALEOMAP PaleoAtlas for GPlates, 2016, [ftp://ftp.earthbyte.org/earthbyte/PaleoAtlas\\_Scotese\\_v2.zip](ftp://ftp.earthbyte.org/earthbyte/PaleoAtlas_Scotese_v2.zip)).

## REFERENCES

115 Anderson, B. M., Hendy, A., Johnson, E. H., and Allmon, W. D., 2017, Paleoecology and  
 116 paleoenvironmental implications of turritelline gastropod-dominated assemblages from the  
 117 Gatun Formation (Upper Miocene) of Panama: Palaeogeography, Palaeoclimatology,  
 118 Palaeoecology, v. 470, p. 132-146.

119 Benway, H. M., Mix, A. C., Haley, B. A., and Klinkhammer, G. P., 2006, Eastern Pacific Warm  
 120 Pool paleosalinity and climate variability: 0-30 kyr: Paleoceanography, v. 21, no. 3.

121 Cannariato, K. G., and Ravelo, A. C., 1997, Pliocene-Pleistocene evolution of eastern tropical  
 122 Pacific surface water circulation and thermocline depth: Paleoceanography, v. 12, no. 6, p.  
 123 805-820.

124 Collins, L.S., and Coates, A.G., 1999, A paleobiotic survey of Caribbean faunas from the  
 125 Neogene of the Isthmus of Panama. Bulletin of American Paleontology, no. 357, Ithaca, 351  
 126 pp.

127 Conkright, M. E., Locarnini, R. A., Garcia, H. E., O'Brien, T. D., Boyer, T. P., Stephens, C., and  
 128 Antonov, J. I., 2002, World Ocean Atlas 2001: Objective analyses, data statistics, and  
 129 figures, in Center, N. O. D., ed.: Silver Spring, MD, National Oceanographic Data Center.

130 Durazzi, J. T., 1981, Stable-isotope studies of planktonic-foraminifera in North-Atlantic core  
 131 tops: Palaeogeography Palaeoclimatology Palaeoecology, v. 33, no. 1-3, p. 157-172.

132 Fraile, I., Mulitza, S., and Schulz, M., 2009, Modeling planktonic foraminiferal seasonality:  
 133 Implications for sea-surface temperature reconstructions: Marine Micropaleontology, v. 72,  
 134 no. 1, p. 1-9.

135 GPlates, 2017, <https://www.gplates.org/> (April 2017).

136 Graniero, L.E., Grossman, E.L., Robbins, J.A., Morales, J., Thompson, R., and O'Dea, A., 2017,  
 137 *Conus* shell  $\delta^{13}\text{C}$  values as proxies for  $\delta^{13}\text{C}_{\text{DIC}}$  in tropical waters. Palaeogeography

138 Palaeoclimatology Palaeoecology, v. 472, p. 119-127.  
 139 Grossman, E. L., and Ku, T. L., 1986, Oxygen and carbon isotope fractionation in biogenic  
 140 aragonite – Temperature effects: Chemical Geology, v. 59, no. 1, p. 59-74.  
 141 Haug, G. H., Tiedemann, R., Zahn, R., and Ravelo, A. C., 2001, Role of Panama uplift on  
 142 oceanic freshwater balance: Geology, v. 29, no. 3, p. 207-210.  
 143 Killingley, J. S., and Berger, W. H., 1979, Stable isotopes in a mollusk shell - Detection of  
 144 upwelling events: Science, v. 205, no. 4402, p. 186-188.  
 145 Jones, D. S., and Allmon, W. D., 1995, Records of upwelling, seasonality and growth in stable-  
 146 isotope profiles of Pliocene mollusk shells from Florida: Lethaia, v. 28, no. 1, p. 61-74.  
 147 Lisiecki, L. E., and Raymo, M. E., 2005, A Pliocene-Pleistocene stack of 57 globally distributed  
 148 benthic  $\delta^{18}\text{O}$  records: Paleoceanography, v. 20, no. 1.  
 149 PALEOMAP PaleoAtlas for GPlates, 2016,  
 150 [ftp://ftp.earthbyte.org/earthbyte/PaleoAtlas\\_Scotese\\_v2.zip](ftp://ftp.earthbyte.org/earthbyte/PaleoAtlas_Scotese_v2.zip) (April 2017)  
 151 Prell, W. L., 1982, Oxygen and carbon isotope stratigraphy for the Quaternary of Hole 502B:  
 152 evidence for two modes of isotopic variability: Init. Rep. DSDP, v. 68, p. 455-464.  
 153 Ravelo, A., and Shackleton, N., 1995, Evidence for surface-water circulation changes at Site 851  
 154 in the east equatorial Pacific, in Proceedings Proceeding of the Ocean Drilling Program,  
 155 Scientific Results, v. 138, p. 503-514.  
 156 Schmidt, M. W., Spero, H. J., and Lea, D. W., 2004, Links between salinity variation in the  
 157 Caribbean and North Atlantic thermohaline circulation: Nature, v. 428, no. 6979, p. 160-163.  
 158 Sepulcre, S., Vidal, L., Tachikawa, K., Rostek, F., and Bard, E., 2011, Sea-surface salinity  
 159 variations in the northern Caribbean Sea across the Mid-Pleistocene Transition: Climate of  
 160 the Past, v. 7, no. 1, p. 75-90.

161 Shackleton, N., and Hall, M., 1989, Stable isotope history of the Pleistocene at ODP Site 677, in  
 162 Proceedings of the Ocean Drilling Program: Scientific results , v. 111, p. 295-316.  
 163 Steph, S., Tiedemann, R., Groeneveld, J., Sturm, A., and Nürnberg, D., 2006, Pliocene changes  
 164 in tropical east Pacific upper ocean stratification: Response to tropical gateways?: Proc.  
 165 ODP, Sci. Results, v. 202, p. 1-51.  
 166 Steph, S., Tiedemann, R., Prange, M., Groeneveld, J., Schulz, M., Timmermann, A., Nurnberg,  
 167 D., Ruhlemann, C., Saukel, C., and Haug, G. H., 2010, Early Pliocene increase in  
 168 thermohaline overturning: A precondition for the development of the modern equatorial  
 169 Pacific cold tongue: Paleoceanography, v. 25, no. 2.  
 170 Tao, K., Robbins, J. A., Grossman, E. L., and O'Dea, A., 2013, Quantifying upwelling and  
 171 freshening in nearshore tropical environments using stable isotopes in modern Tropical  
 172 American mollusks: Bulletin of Marine Science, v. 89, p. 815-835.



## SUPPLEMENTAL FIGURE CAPTIONS

Figure S1. Photographs of representative *Conus* shells viewed from above (spire) and from the side with aperture. Specimens were sampled using a 0.5-mm dental bur in a series of grooves parallel to growth bands (AT06-5-1A) or in a series of narrow-diameter holes (H19711).

Figure S2. Representative oxygen and carbon isotopic profiles of modern and fossil gastropod shells. Lengths are spiral distance from the protoconch to the lip (growth direction). The spire top was not sampled in most specimens because the shell was too thin to avoid penetration of the inner shell layer. Modern shell data are from Tao et al. (2013).

Figure S3. Baseline  $\delta^{18}\text{O}_{\text{ar}}$  values for each modern *Conus* specimen calculated using non-upwelling, non-freshening water conditions based on World Ocean Atlas data (x-axis; Conkright et al., 2002; Tao et al., 2013) and open-ocean core-top foraminifera  $\delta^{18}\text{O}$  (y-axis). There is an excellent correlation between the baseline calculated using World Ocean Atlas data and open-ocean core-top foraminiferal  $\delta^{18}\text{O}$  ( $r = 0.98$ ,  $n = 13$ ,  $p < 10^{-8}$ )  $p < 0.0001$ . An independent-samples t-test was conducted to compare the two variables, and there is not a significant difference ( $t(24) = -0.12$ ,  $r = 0.900$ ).

Figure S4. Box-and-whisker plot of  $\delta^{18}\text{O}$  measurements for mollusks in this study. The box represents the median and 1st and 3rd quartiles (with mean shown as “+”), and are shaded to represent paleodepths. The circles represent the remaining data in each shell, colored based on locality (orange = Caribbean, blue = Pacific).

Figure S5. Box-and-whisker plot of  $\delta^{13}\text{C}$  measurements for mollusks in this study. The box represents the median and 1st and 3rd quartiles (with mean shown as “+”), and are shaded to represent paleodepths. The circles represent the remaining data in each shell, colored based on locality (orange = Caribbean, blue = Pacific).

Figure S6. Correlation coefficient for  $\delta^{18}\text{O}$  versus  $\delta^{13}\text{C}$ , plotted against  $\delta^{18}\text{O}$  range for 4.25-2.5 Ma and 2.5-0.1 Ma age groups and different depth categories (A: without labels, B: with labels).

Figure S7. Correlation coefficient for  $\delta^{18}\text{O}$  versus  $\delta^{13}\text{C}$ , plotted against  $\delta^{18}\text{O}$  difference between median and baseline values ( $\Delta^{18}\text{O}_{\text{Med-bl}}$ ) for 4.25-2.5 Ma and 2.5-0.1 Ma age groups and different depth categories (A: without labels, B: with labels).

## SUPPLEMENTAL TABLES

Table S1 (see separate spreadsheet). Locality, taxonomy, median age and paleodepth for each shell in this study. Baseline values and calculated errors are given, as well as references for the foraminiferal data used to calculate them (1: Steph et al., 2010; 2: Haug et al., 2001; 3: Sepulcre et al., 2011; 4: Prell, 1982; 5: Steph et al., 2006). Median values for  $\delta^{18}\text{O}$  and  $\delta^{13}\text{C}$ , ranges for  $\delta^{18}\text{O}$ , C-O Pearson correlations and p-values (two-tailed test) are listed. See Table S1-v2.1.xlsx

Table S2 (below). Sample locations, depths, and baseline calculations for modern *Conus* specimens from Panamanian coastal waters using data from both the World Ocean Atlas 2001 (Conkright et al., 2002; Tao et al., 2013) and core-top foraminifera (Benway et al., 2006; Cannariato and Ravelo, 1997; Durazzi, 1981; Schmidt et al., 2004). Foraminiferal species used to calculate each baseline are listed (*Globigerinoides ruber* (white), *G. sacculifer*, and *Orbulina universa*). \* Isotope measurements from sediment cores RC13-158, RC13-154, RC10-49, V26-124 were used for these calculations (Durazzi, 1981).

| Shell ID                        | Location          | Depth | WOA-derived<br>baseline (‰) | Foram-derived<br>baseline (‰) | Error | Foram.<br>species | Core      | Source |
|---------------------------------|-------------------|-------|-----------------------------|-------------------------------|-------|-------------------|-----------|--------|
| <i>Southwest Caribbean</i>      |                   |       |                             |                               |       |                   |           |        |
| TA06-294A                       | Gulf of Mosquitos | 40.7  | -0.66                       | -0.66                         | 0.25  | 1                 | Multiple* | D      |
| TA06-294B                       | Gulf of Mosquitos | 40.7  | -0.66                       | -0.66                         | 0.25  | 1                 | "         | D      |
| SB95-1                          | San Blas          | 11    | -1.26                       | -1.04                         | 0.14  |                   |           |        |
| TA04-10A                        | Bocas del Toro    | 15.9  | -1.14                       | -1.04                         | 0.14  | 1                 | "         | D      |
| TA04-10B                        | Bocas del Toro    | 15.9  | -1.14                       | -1.04                         | 0.14  | 1                 | "         | D      |
| TA04-10C                        | Bocas del Toro    | 15.9  | -1.14                       | -1.04                         | 0.14  | 1                 | "         | D      |
| <i>Tropical Eastern Pacific</i> |                   |       |                             |                               |       |                   |           |        |
| GP97-17A                        | Gulf of Panama    | 17    | -2.08                       | -1.78                         | 0.22  | 2                 | ODP 1242  | B      |
| GP97-17B                        | Gulf of Panama    | 17    | -2.08                       | -1.78                         | 0.22  | 2                 | "         | B      |
| 310474                          | Gulf of Panama    | 14.8  | -1.68                       | -1.78                         | 0.22  | 2                 | "         | B      |
| 301490A                         | Gulf of Panama    | 10    | -1.79                       | -1.78                         | 0.22  | 2                 | "         | B      |
| 301490B                         | Gulf of Panama    | 10    | -1.79                       | -1.78                         | 0.22  | 2                 | "         | "      |
| GC97-80A                        | Gulf of Chiriquí  | 61    | 0.20                        | -0.09                         | 0.35  | 3                 | ODP 851   | CR     |
| GC97-80B                        | Gulf of Chiriquí  | 61    | 0.20                        | -0.09                         | 0.35  | 3                 | "         | CR     |

Species: 1 - *G. sacculifer*, *O. universa*; 2 - *G. ruber (white)*; 3 - *G. sacculifer*

Source: D - Durazzi, 1981; B - Benway et al., 2006; CR = Cannariato and Ravelo, 1997

218

219 Table S3 (see separate spreadsheet). Compilation of all isotopic data for fossil gastropods

220 analyzed in this study. Sample information also appears in Table S1.

221

Figure S1

**AT06-5-1A**

La Peña Fmn,  
Burica Peninsula, Pacific  
(~3.5 Ma)

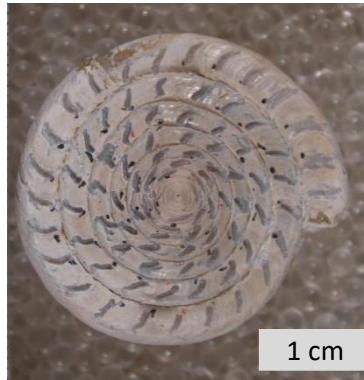

**H19711**

Swan Cay Fmn,  
Bocas del Toro, Caribbean  
(1.6-1.2 Ma)

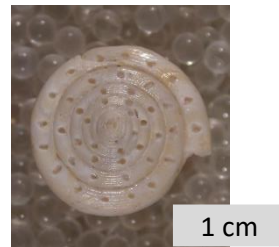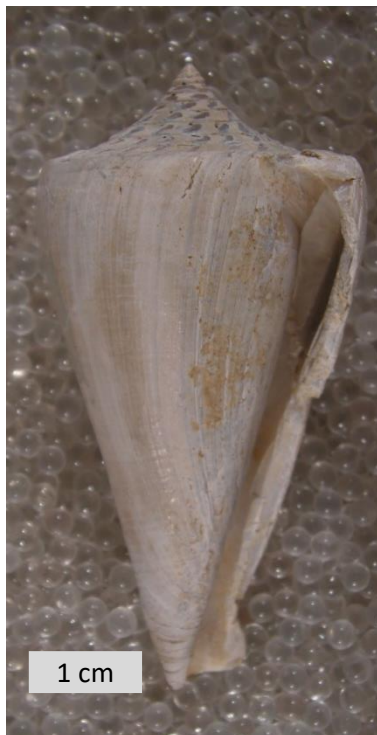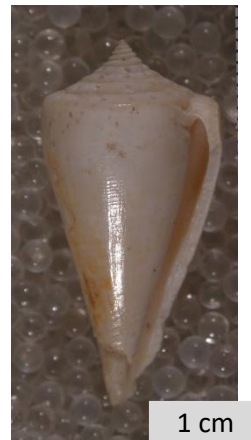

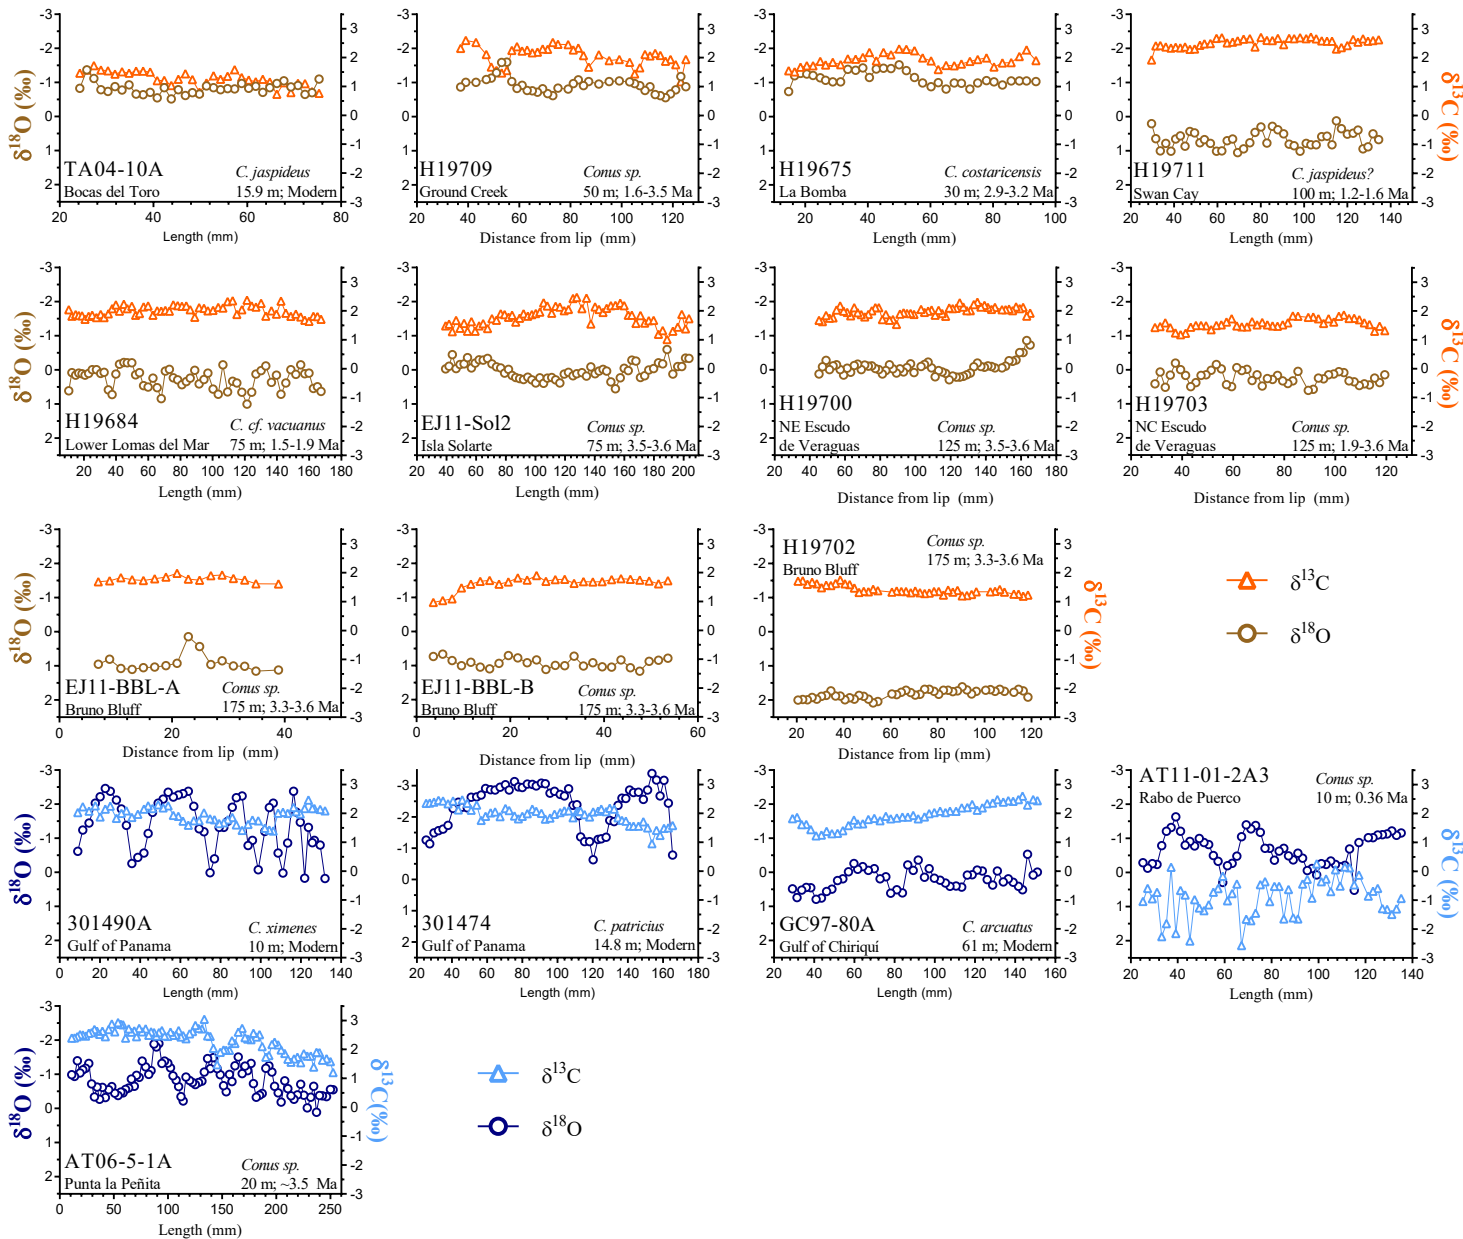

Figure S3

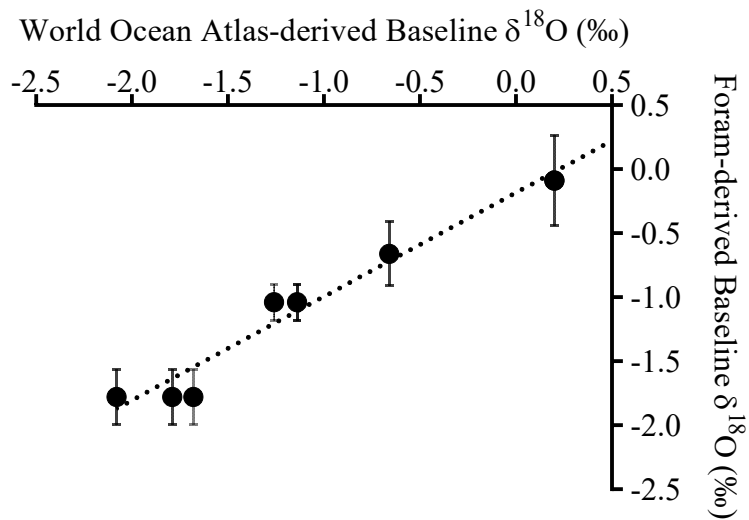

Figure S4

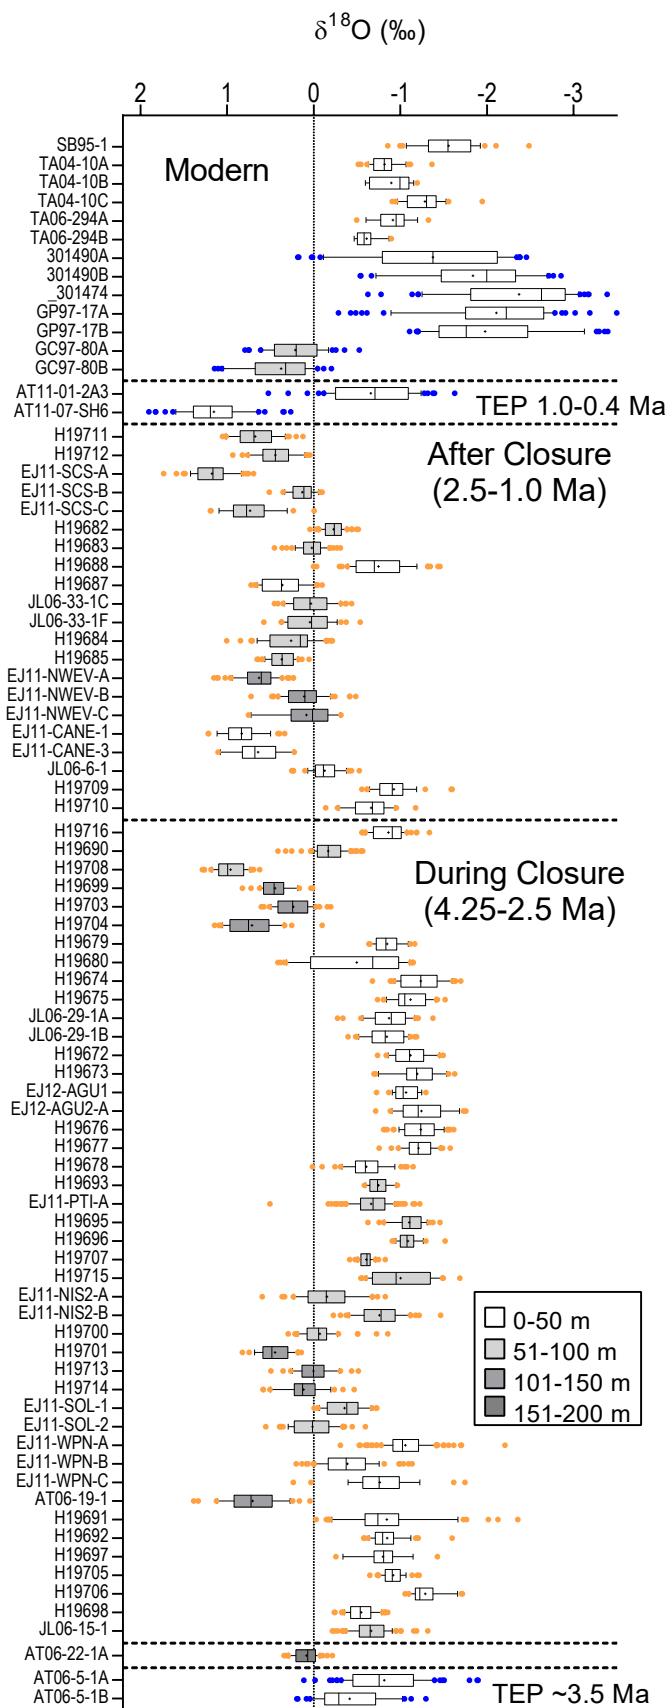

Figure S5

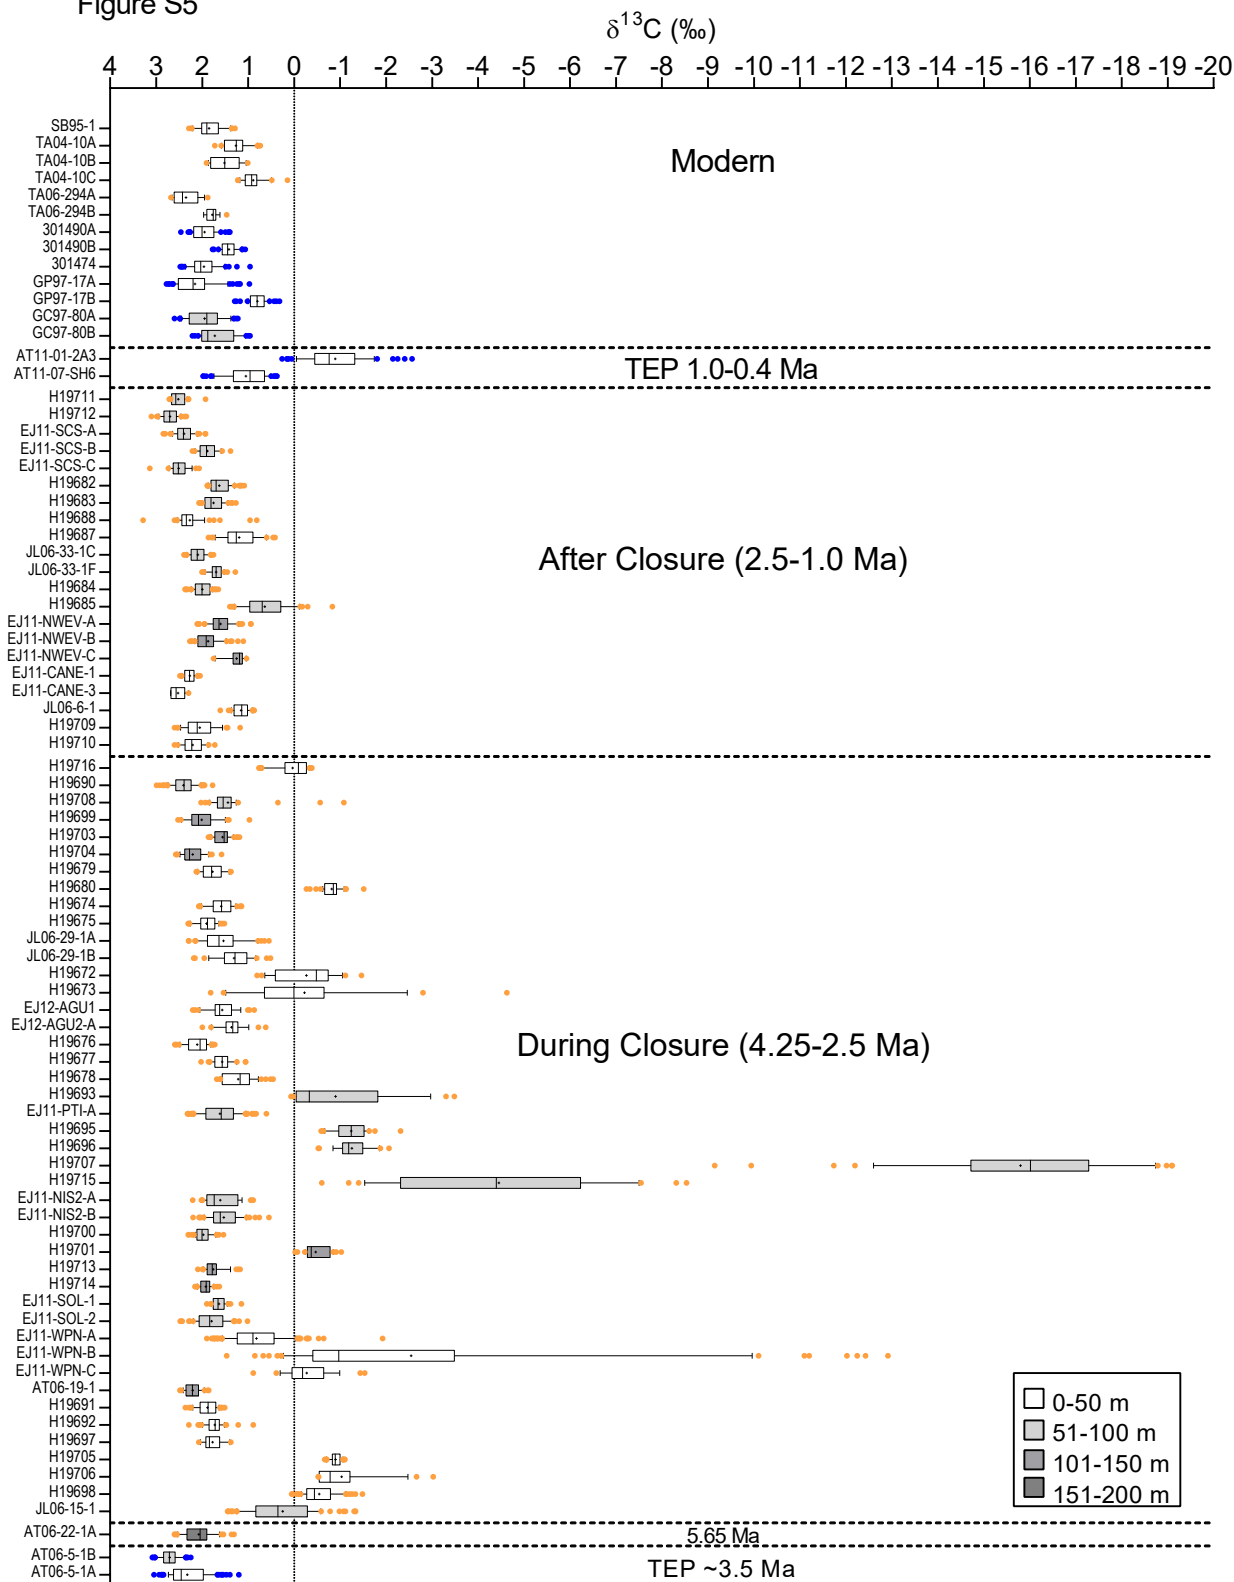



**A**

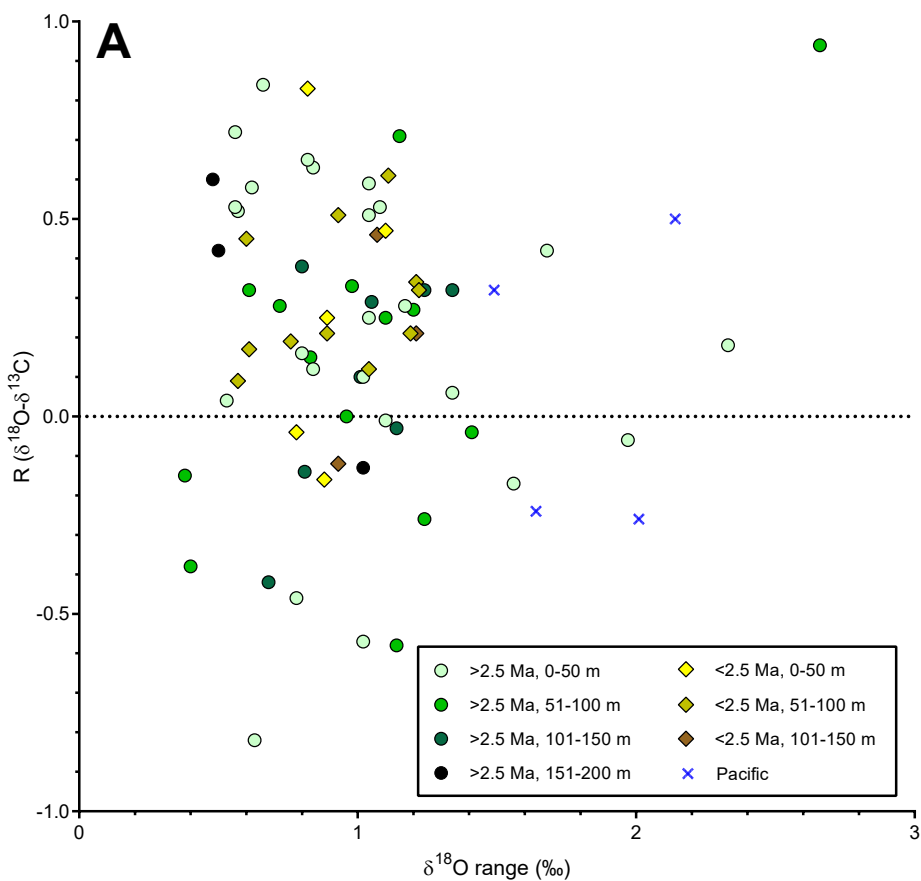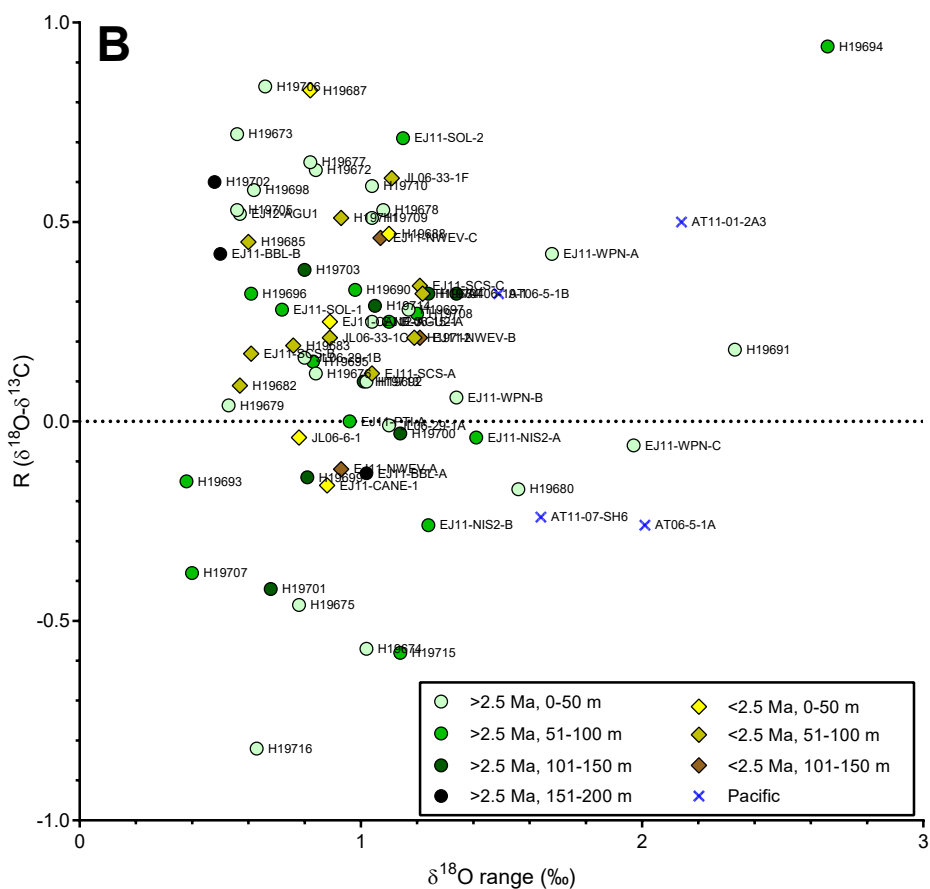

Figure S7

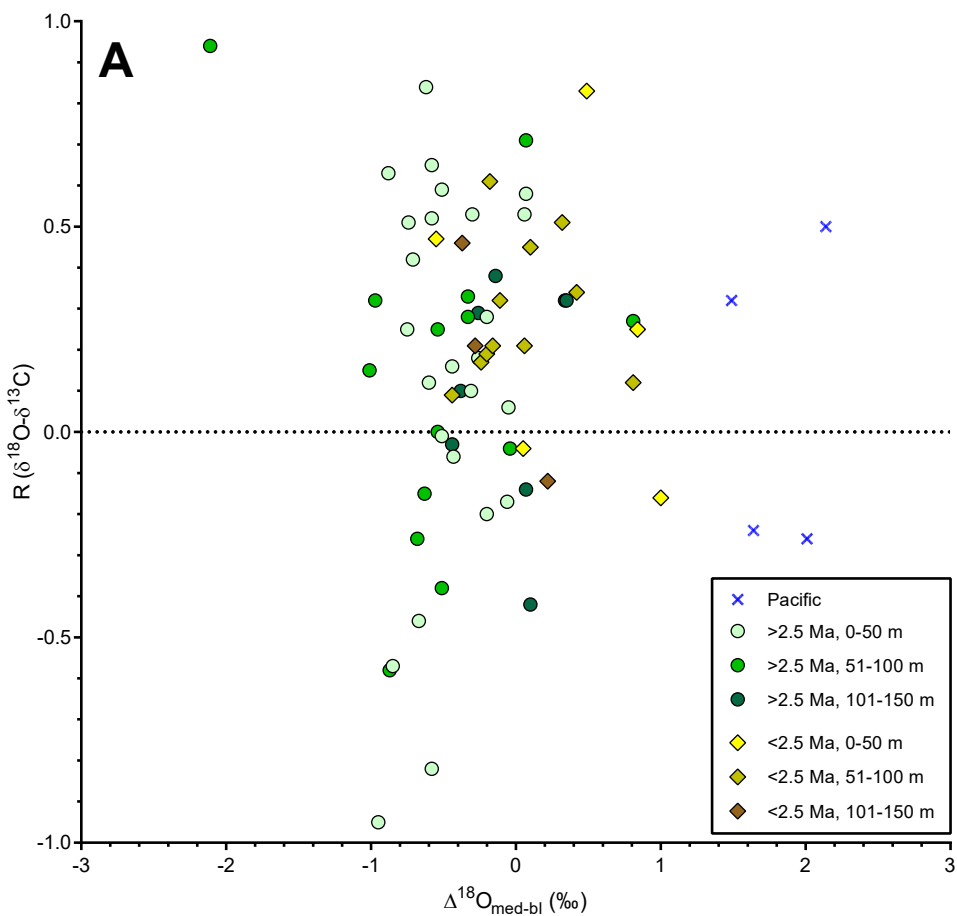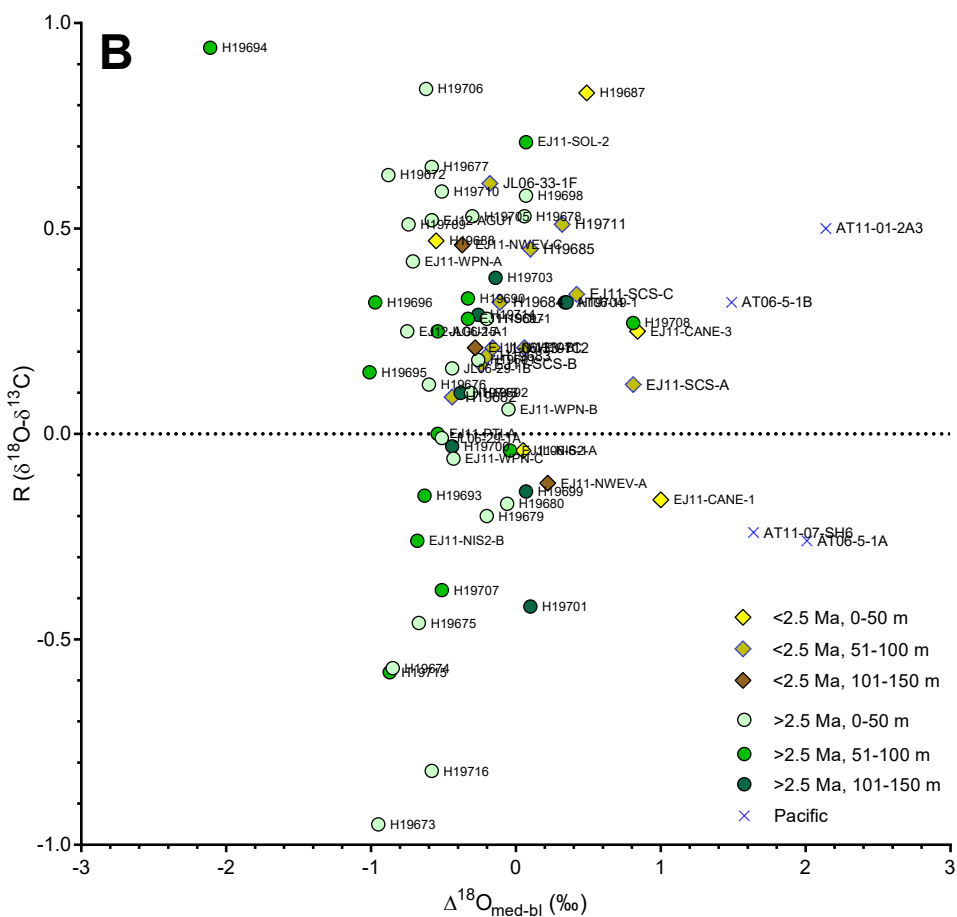

Supplement: Supplementary file 1 [file 1]
